# Supplementary material
Source: PubMed Central journal article supplement (PMC3268347)
Supplement: NIHMS333424-supplement-01.pdf [file NIHMS333424-supplement-01.pdf]

## Supplemental Data

### Figure S1.

Clones of homozygous *emc* and *da* mutant cells are labeled by the lack of GFP expression (green). Da and Emc proteins are shown in magenta.

(A) Da expression in *emc*<sup>AP6</sup> clones in peripodial epithelium of eye-antennal disc (arrows). (B) Da expression in *emc*<sup>AP6</sup> clones in wing imaginal disc (arrow). Da level in *emc* clones is even higher than in the proneural regions adjacent to the dorsoventral wing margin (arrowhead). (C) Da expression in *emc*<sup>AP6</sup> clones in peripodial epithelium of wing disc (arrow). (D) Da expression in *emc*<sup>AP6</sup> clones in prothoracic leg discs (arrow). (E) Da expression in *emc*<sup>AP6</sup> clones in peripodial epithelium of leg disc (arrow). (F) Emc expression in *da*<sup>10</sup> clones in peripodial epithelium of eye-antennal disc (arrow). (G) Emc expression in *da*<sup>10</sup> cells in wing imaginal discs (arrow). Emc is normally low in proneural regions adjacent to the dorso-ventral margin (arrowhead). (H) Emc expression in *da*<sup>10</sup> clones in peripodial epithelium of wing disc (arrow). (I) Emc expression in *da*<sup>10</sup> clones in leg disc (arrows). (J) Emc expression in *da*<sup>10</sup> clones in peripodial epithelium of leg disc (arrow).

**Genotype:** (A-E) *ywhsF*; *emc*<sup>AP6</sup> FRT80/ [*UbiGFP*] *M(3)67C* FRT80; (F-J) *ywhsF*; *da*<sup>10</sup> FRT40/ [*UbiGFP*] FRT40.

### Figure S2.

(A) Map of *da* genomic region and *da*<sup>+</sup> genomic transgene. Fragments tested for Da-dependent enhancer activity are indicated. (B) Fold activation of the luciferase reporter

for each pGL3-enhancer construct upon co-transfection of pRact-*da*, normalized by fold activation for pGL3 vector alone. Reporter activity was strongly enhanced by Fragment 3. For the data shown, enhancer fragments are in reverse orientation to the promoter to rule out the possibility that *da* has internal transcription start sites (the *da* ORF is entirely within the second exon). When Fragment 3 was cloned in the forward orientation, there was no Da dependent transcription stimulation, suggesting an insulator element at the 3' end of Fragment 3. Just such an insulator is predicted by genome-wide studies of insulator-associated protein binding (Negre et al., 2010; Roy et al., 2010). (C) A *da-Gal4* transgene incorporating the *da* transcription start site and 3.2 kb of 5' DNA extending downstream from the HindIII site in *mRps7* gene (genomic location 2L: 10386953) (Wodarz et al., 1995) gives variegated expression of the UAS-LacZ reporter (green). Differentiation is marked by Elav expression in magenta. Similar variegation was also seen in our pBPeGFPdaw constructs, which also include the *da* promoter without the 3'-end of the gene (main text Figure 2E-H).

Genotypes: (C) *w*; *UAS-nuclacZ/+*; *da-Gal4/+*.

### Figure S3.

Mutant clones lack either GFP or  $\beta$ -gal (green). Emc or Da proteins are shown in magenta. Yellow arrowheads indicate position of the morphogenetic furrow and yellow arrows indicate morphogenetic furrow in mutant clones.

(A and B) *shn<sup>1B</sup>* clones that cannot respond to Dpp. Emc expression is partially maintained in the furrow and Da does not increase so highly. In addition, either *shn<sup>1B</sup>* or *Mad<sup>10</sup>* clones expressed Emc at a higher level and Da at a slightly lower level than wild

type cells, suggesting Dpp signaling may also contribute to *emc* and *da* expression anterior to the furrow.

(C and D) In *arr<sup>2</sup>* mutant clones that cannot respond to Wg, Emc and Da expression remained normal.

(E and F) In *arr<sup>2</sup> shn<sup>1B</sup>* double mutant cells that cannot respond to either Wg or Dpp, Emc and Da expression remained normal inside or outside of the furrow, as in *arr<sup>2</sup>* clones (panels C and D).

(G and H) In *smo<sup>3</sup> arr<sup>2</sup> shn<sup>1B</sup>* triple mutant clones that cannot respond to Hh, Wg and Dpp, Emc is higher and Da is slightly lower than that in adjacent cells, ahead of the morphogenetic furrow. In *smo<sup>3</sup> arr<sup>2</sup> shn<sup>1B</sup>* triple mutant cells, pre-furrow levels of Emc and Da are maintained in the furrow, as in *smo<sup>3</sup> Mad<sup>12</sup>* clones (Figure 3D and E).

Genotypes: (A and B) *ywhsF*; FRT42 *shn<sup>1B</sup>*/ FRT42 [*UbiGFP*] *M(2)56F*; (C and D) *ywhsF*; FRT42 *arr<sup>2</sup>*/ FRT42 [*UbiGFP*] *M(2)56F*; (E and F) *ywhsF*; FRT42 *arr<sup>2</sup> shn<sup>1B</sup>*/ FRT42 [*UbiGFP*] *M(2)56F*; (G and H) *ywhsF*; *smo<sup>3</sup>* FRT42 *arr<sup>2</sup> shn<sup>1B</sup>*/ *smo<sup>D16</sup>* FRT42 P{*smo<sup>+</sup>*} [*UbiGFP*] *M(2)56F*.

#### **Figure S4.**

Homozygous mutant clones are marked by the absence of GFP expression (green). Elav expression (blue) labels all neurons. (A) Runt expression (red) marks R8 cells from column 1 onwards and R7 cells from column 8 or 9 onwards (Kaminker et al., 2002).

Ahead of the morphogenetic furrow, loss of *emc* leads to ectopic neuronal cells (arrows) that express Elav but not Runt. (B) *da<sup>3</sup> emc<sup>AP6</sup>* double mutant clones lack ectopic neural

differentiation ahead of the furrow (arrowhead) as well as neural differentiation behind the furrow (arrow).

Genotype: (A) *ywhsF*; *emc*<sup>AP6</sup> FRT80/ [*UbiGFP*] *M(3)67C* FRT80; (B) *ywhsF*; *da*<sup>3</sup>; *P{da<sup>+</sup>, w<sup>+</sup>}68A4* [*UbiGFP*] FRT80/ *emc*<sup>AP6</sup> FRT80.

### Figure S5.

(A and B) Flip-on clones expressing *emc* from *emc*<sup>EP3620</sup> line were marked by GFP expression (green). (A) The *sca* gene is expressed in the clusters of 6-10 cells at the anterior of the morphogenetic furrow ('intermediate groups') that elevate Ato, and later in the isolated R8 precursor cells that also express Ato. A lower, uniform level of secreted Sca protein is taken up by other nearby cells (Lee et al., 1996). When *emc* expression was maintained, Sca expression (magenta) was lower, so that the intermediate groups no longer stood out above the background of secreted Sca protein (white arrows), in contrast to the situation outside the clone (yellow arrows).

(B) Spalt-major (Salm) is a transcription factor expressed in R7 cells (white arrowhead) and in non-neuronal cone cells (white arrow) (Domingos et al., 2004). Maintaining *Emc* expression delayed onset of Salm expression (red) in R7 cells and cone cells by 2 columns (yellow arrowhead and arrow, respectively). Salm is also present transiently in R3 and R4 cells, closer to the furrow (Domingos et al., 2004).

(C) Prothoracic leg disc expressing UAS-GFP under the control of *en-Gal4*. *Emc* protein (red); *Da* protein (blue).

(D, E) Posterior views of the adult prothoracic femur (D) and tibia (E). The posterior compartments bear  $40 \pm 1.6$  and  $31.9 \pm 1.0$  sensory bristles, respectively (n = 16).

(F) Prothoracic leg disc from *en-Gal4 UAS-GFP emc<sup>EP3620</sup>* at 23°C. Emc protein (red); Da protein (blue). Note that Emc and Da levels are not noticeably changed in the posterior compartment, except that SOP's are reduced.

(G, H) Posterior views of the adult prothoracic femur (G) and tibia (H) from *en-Gal4 UAS-GFP emc<sup>EP3620</sup>* at 23°C. The posterior compartments bear only  $17.7 \pm 2.3$  bristles on the femur (G) and  $4.8 \pm 1.4$  bristles on the tibia (H). N = 24.

(I) Clones over expressing Da are marked by GFP expression (green). Da overexpression occasionally led to ectopic neuronal differentiation (Elav: magenta) ahead of the furrow (yellow arrow).

(J) Clones ectopically expressing Sc and GFP (green) in the notum region of the late 3rd instar wing disc. No Elav-expressing neurons are seen (magenta).

(K) Clones over-expressing Da and GFP likewise lack ectopic neural differentiation in the notum (Elav: magenta).

(L) Clones co-expressing GFP, Sc and Da induced ectopic neural differentiation in the notum (Elav: magenta). Sens expression in the developing macrochaetae was used to identify wing discs of comparable developmental stage for panels (J-L) (not shown).

Genotypes: (A-B) *ywhsF; emc<sup>EP3620</sup>/act>CD2>Gal4, UAS-GFP*; (C-E) *en-Gal4, UAS-GFP/+*; (F-H) *en-Gal4, UAS-GFP/+; emc<sup>EP3620</sup>/+*; (I and K) *ywhsF; UAS-da/+; act>CD2>Gal4, UAS-GFP/+*; (J) *ywhsF; UAS-sc/+; act>CD2>Gal4, UAS-GFP/+*; (L) *ywhsF; UAS-da/ UAS-sc; act>CD2>Gal4, UAS-GFP/+*.

## Supplemental Experimental Procedure

### Drosophila husbandry and strains

All flies were raised at 25°C except otherwise where specified. For non-Minute genotypes, larvae were subjected to 1 hour heat shock at 37°C, 60 ± 12 hr after egg laying, to induce FLP-mediated mitotic recombination. For Minute genotypes, heat shock was 84 ± 12 hours after egg laying. The MARCM technique was used to obtain *da* over-expressing clones in either *M/+* or *+/+* backgrounds (Lee and Luo, 1999). ‘Flip-on’ clones were generated by applying heat shock for 30 minutes at 37°C after 60 ± 12 hours of egg laying. Larvae were usually dissected ~72 hours after heat shock. Flies were raised at 29°C when generating flip-on clones expressing *emc* from *emc*<sup>EP3620</sup> or MARCM clones over-expressing *da*, and at 23°C when expressing *emc* from *emc*<sup>EP3620</sup> using *en-Gal4*.

The following transgenic and mutant strains were used: *w*<sup>1118</sup>; *emc*<sup>AP6</sup> (Ellis, 1994); *da*<sup>10</sup> (Caudy et al., 1988); *da*<sup>2</sup> and *da*<sup>3</sup> (Cronmiller and Cline, 1987); *act>CD2>Gal4*, *UAS-GFP* (Pignoni and Zipursky, 1997; Neufeld et al., 1998); [*Ubi-GFP*] *M(3)67C FRT80* (Janody et al., 2004); *UAS-da* (Hinz et al., 1994); *smo*<sup>3</sup> (Chen and Struhl, 1998); *shn*<sup>1B</sup> (Arora et al., 1995); *top*<sup>CO</sup> (Price et al., 1989); *mam*<sup>10</sup> (Lehmann, 1983); *Mad*<sup>10</sup> (Sekelsky et al., 1995); *Mad*<sup>12</sup> (Raftery et al., 1995; Sekelsky et al., 1995); *arr*<sup>2</sup> (Wehrli et al., 2000); *ato*<sup>1</sup> (Jarman et al., 1994); *emc*<sup>EP3620</sup> (Abdelilah-Seyfried et al., 2000); [*arm-LacZ*] *FRT80* (Vincent et al., 1994); *UAS-ato* (Jarman et al., 1994); *UAS-sc* (Parras et al.,

1996); *da-Gal4* (Wodarz et al., 1995); [*Ubi-GFP*] FRT40; FRT82 [*tub-Gal80*] (Lee and Luo, 1999); *GMR-Gal4* (Freeman, 1996).

### **Construction of *da*<sup>+</sup> genomic rescue transgenes on chromosomes 1 and 2**

**The *da*<sup>+</sup> transgene was designed based on previous transgenes that no longer exist (Brand and Campos-Ortega, 1990; Smith and Cronmiller, 2001).** An 8.8kb genomic region from the EcoRI site in *cdc2* gene to the KpnI site in the *CG5362* gene was sub-cloned from cosmid clone 100A9 (Siden-Kiamos et al., 1990) into pW8 (Klemenz et al., 1987).

DNA for injection was prepared using QIAfilter Plasmid Midi Kit (Qiagen) and sent to Model System Genomics, Duke University for generation of transgenic flies. Independent transgenic lines were obtained by P-element integration into 1<sup>st</sup> and 2<sup>nd</sup> chromosome. One copy of either transgene was able to rescue *da*<sup>10</sup>/*da*<sup>3</sup> or *da*<sup>3</sup>/*da*<sup>3</sup> flies to normal fertile adults.

### **Antibodies**

Antibody labeling were performed as described previously (Firth et al., 2006; Bhattacharya and Baker, 2009). Primary antibodies used were: mouse anti-βGal (mAb40-1a) (1:100), rat anti-ELAV (7E8A10) (1:50), mouse anti-ELAV (9F8A9) (1:100), mouse anti-Ro (1:25), all from DSHB, mouse anti-Da (1:200) (Cronmiller and Cummings, 1993), rabbit anti-Emc (1:8000) (a gift from Y.N. Jan) (Brown et al., 1995), guinea pig anti-Sens (1:500) (Nolo et al., 2000), rabbit anti-Ato (1:50000) (Jarman et al., 1994),

rabbit anti-Salm (1:50) (Kuhnlein et al., 1994); mouse anti-Sca (Rd2) (1:50) (Lee et al., 1996), guinea pig anti-Runt (1:1500) (Duffy et al., 1991), anti-GFP (1:500) (Invitrogen). Secondary antibodies used were multi-labeling antibodies from Jackson ImmunoResearch Laboratories.

### **Quantitative RT-PCR (qPCR)**

Total RNA was isolated either from 3<sup>rd</sup> instar eye imaginal discs, from which antennal discs had been removed, or from HEK293T cells 48hr after transfection, using TriZol (Invitrogen) per the manufacturer's protocol, followed by RQ1-DNase (Promega) treatment. Total cDNA was synthesized using oligo(dT)<sub>20</sub> primer and SuperScript III First-Strand Synthesis System, according to the Invitrogen protocol. qPCR was performed using gene specific primers and SYBR Green PCR Master Mix (Applied Biosystems) either in a SmartCycler System (Cepheid) for *Drosophila* RNA or in a 7900HT FAST Real-Time PCR System (Applied Biosystems) for human RNA. Melting curves were analyzed for purity of the product. For *Drosophila* eye discs, *gal4* transcript was used as an internal control to normalize RNA template levels. For 293T cells, *actβ* transcript was used as an internal control for normalization.

Primers used against the first exon of *da* to specifically amplify the endogenous transcript:

Forward primer 5' GTGGCTCAACGTCAACACTC 3'

Reverse primer 5' TACAAGTGCATCGGCTCATC 3'

Primers used to amplify *emc* transcript:

Forward primer 5' ACCAACTCAGCAGCACACAC 3'



Reverse primer 5' TGCCTGGAAATGAACTTTCTC 3'

Primers used to amplify *gal4* transcript:

Forward primer 5' ACCAATTGCCTCCTCTAACG 3'

Reverse primer 5' GTCCAACCAGGTGACAGTGG 3'

Primers used to amplify *actβ* transcript (Wang et al., 2008):

Forward primer 5' CCCAGCCATGTACGTTGCTA 3'

Reverse primer 5' TCACCGGAGTCCATCACGAT 3'

Primers used to amplify *E2a* transcript:

Forward primer 5' CACCAGCACGAGCGTATG 3'

Reverse primer 5' GAGAAGGAGGATGCAGATGG 3'

Primers used to amplify *HEB* transcript (PrimerBank):

Forward primer 5' CAACCACACTGCCAGGAAC 3'

Reverse primer 5' GCCTACTGATAACTCTGGAAGTGG 3'

Primers used to amplify *E2-2* transcript:

Forward primer 5' TGAGAACCTGCAAGACACG 3'

Reverse primer 5' GGTGTCAGGTCCTCATCGTC 3'

Primers used to amplify *Id1* transcript (PrimerBank):

Forward primer 5' CTGCTCTACGACATGAACGG 3'

Reverse primer 5' GAAGGTCCCTGATGTAGTCGAT 3'

Primers used to amplify *Id2* transcript (PrimerBank):

Forward primer 5' GACCCGATGAGCCTGCTATAC 3'

Reverse primer 5' AATAGTGGGATGCGAGTCCAG 3'

Primers used to amplify *Id3* transcript (PrimerBank):

Forward primer 5' CATCGACTACATTCTCGACCTG 3'

Reverse primer 5' TCCTTTTGTTCGTTGGAGATGAC 3'

Primers used to amplify *Id4* transcript (PrimerBank):

Forward primer 5' TCCCGCCCAACAAGAAAGTC 3'

Reverse primer 5' CCAGGATGTAGTCGATAACGTG 3'

### **Analysis of *da* enhancers in vivo**

pBPeGFPdaw (Figure 2D, main text) was made from pBPGUw (Pfeiffer et al., 2008).

The *Gal4-hsp70* 3' UTR cassette of pBPGUw was replaced by *eGFP-NLS-SV40* 3' UTR from the pStinger vector (Barolo et al., 2000), using 5' *KpnI* and 3' *SpeI* sites to get pBPeGFPUw. To replace the *Drosophila* synthetic core promoter (Pfeiffer et al., 2008) with 542bp of *da* proximal promoter region, genomic DNA (2L: 10387806-10388342) was PCR amplified from the *da*<sup>+</sup> genomic rescue plasmid using Platinum Taq DNA polymerase high fidelity (Invitrogen), cloned into PCR 2.1- TOPO (Invitrogen), and confirmed by sequencing. The *da* promoter fragment was recovered by *EcoRI* digestion and cloned by blunt end ligation into pBPeGFPUw digested with *FseI* and *KpnI* after repair with Klenow to get pBPeGFPdaw. Fragment 3 (Figure 2D), obtained by *BglII* digestion of cosmid 100A9 (Siden-Kiamos et al., 1990), was repaired using Platinum Taq DNA polymerase high fidelity (Invitrogen), cloned into pCP8/GW/TOPO (Invitrogen), and confirmed by sequencing. Fragment 3 was transferred into pBPeGFPdaw in the reverse orientation using the in-vitro LR reaction using Gateway LR Clonase II Enzyme Mix (Invitrogen) to replace the cell lethal *ccdB* gene positioned within Gateway cloning sites. To make the *da* promoter only construct, i.e pBPeGFPdaw vector without the *ccdB*

gene, Fragment 3 was removed from the pCP8/GW/TOPO clone by *EcoRI* digestion before the LR reaction. DNA for injection was prepared using QIAfilter Plasmid Midi Kit (Qiagen). DNA constructs were microinjected into *yw {nos-PhiC31 integ, y<sup>+</sup>}/Y; {y<sup>+</sup> attP2}* (Bischof et al., 2007) embryos by Model System Genomics (Duke University). Single males derived from these embryos were crossed to *w; Sb/TM6B* females and individual F1 males with *w<sup>+</sup>* eye color selected. This step removed the integrase source. Individual males were crossed to *w; Sb/TM6B* females to establish balanced stocks.

### **Cell culture, transient transfection, luciferase and $\beta$ -galactosidase assays**

*Drosophila* Schneider S2 cells were cultured at 25°C in Schneider's *Drosophila* Medium (GIBCO) supplemented with 10% heat inactivated fetal bovine serum and Penicillin-Streptomycin (Invitrogen). Transient transfection of approx.  $1.8 \times 10^5$  cells/0.7 ml in 24 well plates were performed using Effectene Transfection Reagent (Qiagen), according to the manufacturer's protocol. All plasmids were purified using QIAprep Spin Plasmid Miniprep Kit (Qiagen), according to the manufacturer's protocol. *da* was over-expressed by adding 10 ng of pRact-*da*. 25 ng of *hs-lacZ* construct was added per well for normalization of transfection efficiency. Total amount of DNA added to each well was adjusted to 200 ng using empty pRactHAdh (Swevers et al., 1996) vector. Luciferase activities were assayed using Luciferase Assay System (Promega), according to the manufacturer's protocol. Luminescence was measured using a Turner TD-20/20 luminometer.

HEK 293T cells were cultured at 37°C in DME medium supplemented with 10% fetal bovine serum, Penicillin-Streptomycin (Invitrogen), 1% Pyruvate, 1% L-Glutamate and 0.1%  $\beta$ -Mercaptoethanol. Transient transfection of approx.  $6 \times 10^6$  cells in 10-cm plates was performed using Lipofectamine2000 reagent (Invitrogen), according to the manufacturer's protocol. All plasmids were purified using QIAfilter Plasmid Midi Kit (Qiagen), according to the manufacturer's protocol. Human E47 was over-expressed by transfecting 300 ng of pcDNA3-hE47 (Jen et al., 1992). 1.5  $\mu$ g of pMX-GFP construct was added to monitor transfection efficiency, which was typically 70-80%. The total amount of DNA added to each plate was adjusted to 10  $\mu$ g using empty pcDNA3 vector (Invitrogen).

### **Cloning of *da* enhancer fragments into pGL3-Promoter vector**

Coordinates of fragments cloned into pGL3-promoter vector (Promega):

Fragment 1: From 5' HincII (at genome location 10386986) to 3' HincII site (at genome location 10388342).

Fragment 2: From 5' Sall (at genome location 10388340) to 3' BglII site (at genome location 10390048).

Fragment 3: From 5' BglII (at genome location 10390048) to 3' BglII site (at genome location 10392573).

Fragment 4: From 5' XhoI (at genome location 10391544) to 3' NheI site (at genome location 10393810).

All genomic locations mentioned are according to release=r5.32.

Standard cloning methods were used to clone all above fragments in both orientations at multiple cloning site of pGL3-Promoter vector (Promega) upstream of SV40 minimal promoter.

## References

- Abdelilah-Seyfried, S., Chan, Y. M., Zeng, C., Justice, N. J., Younger-Shepherd, S., Sharp, L. E., Barbel, S., Meadows, S. A., Jan, L. Y., and Jan, Y. N. (2000). A gain-of-function screen for genes that affect the development of the *Drosophila* adult external sensory organ. *Genetics* *155*, 733-752.
- Arora, K., Dai, H., Kazuko, S. G., Jamal, J., O'Connor, M. B., Letsou, A., and Warrior, R. (1995). The *Drosophila* *schnurri* gene acts in the Dpp/TGF beta signaling pathway and encodes a transcription factor homologous to the human MBP family. *Cell* *81*, 781-790.
- Barolo, S., Carver, L. A., and Posakony, J. W. (2000). GFP and beta-galactosidase transformation vectors for promoter/enhancer analysis in *Drosophila*. *Biotechniques* *29*, 726-732.
- Bhattacharya, A., and Baker, N. E. (2009). The HLH protein Extramacrochaetae is required for R7 cell and cone cell fates in the *Drosophila* eye. *Dev Biol* *327*, 288-300.
- Bischof, J., Maeda, R. K., Hediger, M., Karch, F., and Basler, K. (2007). An optimized transgenesis system for *Drosophila* using germ-line-specific phiC31 integrases. *Proc Natl Acad Sci U S A* *104*, 3312-3317.
- Brand, M. and Campos-Ortega, J. A. (1990). Second-site modifiers of the *split* mutation of *Notch* define genes involved in neurogenesis in *Drosophila melanogaster*. *Roux's Arch Dev Biol* *198*, 275-285.
- Brown, N. L., Paddock, S. W., Sattler, C. A., Cronmiller, C., Thomas, B. J., and Carroll, S. B. (1996). *daughterless* is required for *Drosophila* photoreceptor cell determination, eye morphogenesis, and cell cycle progression. *Dev Biol* *179*, 65-78.
- Brown, N. L., Sattler, C. A., Paddock, S. W., and Carroll, S. B. (1995). *Hairy* and *emc* negatively regulate morphogenetic furrow progression in the *Drosophila* eye. *Cell* *80*, 879-887.
- Caudy, M., Vassin, H., Brand, M., Tuma, R., Jan, L. Y., and Jan, Y. N. (1988). *daughterless*, a *Drosophila* gene essential for both neurogenesis and sex determination, has sequence similarities to *myc* and the *achaete-scute* complex. *Cell* *55*, 1061-1067.
- Chen, Y., and Struhl, G. (1998). In vivo evidence that *Patched* and *Smoothed* constitute distinct binding and transducing components of a Hedgehog receptor complex. *Development* *125*, 4943-4948.

Cronmiller, C., and Cline, T. W. (1987). The *Drosophila* sex determination gene daughterless has different functions in the germ line versus the soma. *Cell* 48, 479-487.

Cronmiller, C., and Cummings, C. A. (1993). The daughterless gene product in *Drosophila* is a nuclear protein that is broadly expressed throughout the organism during development. *Mech Dev* 42, 159-169.

Domingos, P. M., Brown, S., Barrio, R., Ratnakumar, K., Frankfort, B. J., Mardon, G., Steller, H., and Mollereau, B. (2004). Regulation of R7 and R8 differentiation by the spalt genes. *Dev Biol* 273, 121-133.

Ellis, H. M. (1994). Embryonic expression and function of the *Drosophila* helix-loop-helix gene, extramacrochaetae. *Mech Dev* 47, 65-72.

Firth, L. C., Li, W., Zhang, H., and Baker, N. E. (2006). Analyses of RAS regulation of eye development in *Drosophila melanogaster*. *Methods Enzymol* 407, 711-721.

Freeman, M. (1996). Reiterative use of the EGF receptor triggers differentiation of all cell types in the *Drosophila* eye. *Cell* 87, 651-660.

Hinz, U., Giebel, B., and Campos-Ortega, J. A. (1994). The basic-helix-loop-helix domain of *Drosophila* lethal of scute protein is sufficient for proneural function and activates neurogenic genes. *Cell* 76, 77-87.

Janody, F., Lee, J. D., Jähren, N., Hazelett, D. J., Benlali, A., Miura, G. I., Draskovic, I., and Treisman, J. E. (2004). A mosaic genetic screen reveals distinct roles for trithorax and polycomb group genes in *Drosophila* eye development. *Genetics* 166, 187-200.

Jarman, A. P., Grell, E. H., Ackerman, L., Jan, L. Y., and Jan, Y. N. (1994). Atonal is the proneural gene for *Drosophila* photoreceptors. *Nature* 369, 398-400.

Jen, Y., Weintraub, H., and Benezra, R. (1992). Overexpression of Id protein inhibits the muscle differentiation program: in vivo association of Id with E2A proteins. *Genes Dev* 6, 1466-1479.

Kaminker, J. S., Canon, J., Salecker, I., Banerjee, U. (2002). Control of photoreceptor axon target choice by transcriptional repression of Runt. *Nat Neurosci*. 5, 746-50.

Klemenz, R., Weber, U., and Gehring, W. J. (1987). The white gene as a marker in a new P-element vector for gene transfer in *Drosophila*. *Nucleic Acids Res* 15, 3947-3959.

Kuhnlein, R. P., Frommer, G., Friedrich, M., Gonzalez-Gaitan, M., Weber, A., Wagner-Bernholz, J. F., Gehring, W. J., Jackle, H., and Schuh, R. (1994). spalt encodes an evolutionarily conserved zinc finger protein of novel structure which provides homeotic gene function in the head and tail region of the *Drosophila* embryo. *Embo J* 13, 168-179.

Lee, E. C., Hu, X., Yu, S. Y., and Baker, N. E. (1996). The scabrous gene encodes a secreted glycoprotein dimer and regulates proneural development in *Drosophila* eyes. *Mol Cell Biol* 16, 1179-1188.

Lee, T., and Luo, L. (1999). Mosaic analysis with a repressible cell marker for studies of gene function in neuronal morphogenesis. *Neuron* 22, 451-461.

Lehmann, R., Jimenez, F., Dietrich, U., Campos-Ortega, J.A. (1983). On the phenotype and development of mutants of early neurogenesis in *Drosophila melanogaster*. *Roux Arch dev Biol* 192, 62-74.

Negre, N., Brown, C. D., Shah, P. K., Kheradpour, P., Morrison, C. A., Henikoff, J. G., Feng, X., Ahmad, K., Russell, S., White, R. A., *et al.* (2010). A comprehensive map of insulator elements for the *Drosophila* genome. *PLoS Genet* 6, e1000814.

Neufeld, T. P., de la Cruz, A. F., Johnston, L. A., and Edgar, B. A. (1998). Coordination of growth and cell division in the *Drosophila* wing. *Cell* 93, 1183-1193.

Nolo, R., Abbott, L. A., and Bellen, H. J. (2000). Senseless, a Zn finger transcription factor, is necessary and sufficient for sensory organ development in *Drosophila*. *Cell* *102*, 349-362.

Parras, C., Garcia-Alonso, L. A., Rodriguez, I., and Jimenez, F. (1996). Control of neural precursor specification by proneural proteins in the CNS of *Drosophila*. *Embo J* *15*, 6394-6399.

Pfeiffer, B. D., Jenett, A., Hammonds, A. S., Ngo, T. T., Misra, S., Murphy, C., Scully, A., Carlson, J. W., Wan, K. H., Laverty, T. R., *et al.* (2008). Tools for neuroanatomy and neurogenetics in *Drosophila*. *Proc Natl Acad Sci U S A* *105*, 9715-9720.

Pignoni, F., and Zipursky, S. L. (1997). Induction of *Drosophila* eye development by decapentaplegic. *Development* *124*, 271-278.

Price, J. V., Clifford, R. J., and Schupbach, T. (1989). The maternal ventralizing locus torpedo is allelic to faint little ball, an embryonic lethal, and encodes the *Drosophila* EGF receptor homolog. *Cell* *56*, 1085-1092.

Raftery, L. A., Twombly, V., Wharton, K., and Gelbart, W. M. (1995). Genetic screens to identify elements of the decapentaplegic signaling pathway in *Drosophila*. *Genetics* *139*, 241-254.

Roy, S., Ernst, J., Kharchenko, P. V., Kheradpour, P., Negre, N., Eaton, M. L., Landolin, J. M., Bristow, C. A., Ma, L., Lin, M. F., *et al.* (2010). Identification of Functional Elements and Regulatory Circuits by *Drosophila* modENCODE. *Science* *330*, 1787-1797.

Sekelsky, J. J., Newfeld, S. J., Raftery, L. A., Chartoff, E. H., and Gelbart, W. M. (1995). Genetic characterization and cloning of mothers against dpp, a gene required for decapentaplegic function in *Drosophila melanogaster*. *Genetics* *139*, 1347-1358.

Shi, W., Stampas, A., Zapata, C., and Baker, N. E. (2003). The pineapple eye gene is required for survival of *Drosophila* imaginal disc cells. *Genetics* *165*, 1869-1879.

Siden-Kiamos, I., Saunders, R. D., Spanos, L., Majerus, T., Treanear, J., Savakis, C., Louis, C., Glover, D. M., Ashburner, M., and Kafatos, F. C. (1990). Towards a physical map of the *Drosophila melanogaster* genome: mapping of cosmid clones within defined genomic divisions. *Nucleic Acids Res* *18*, 6261-6270.

Smith, J. E., 3rd, and Cronmiller, C. (2001). The *Drosophila* daughterless gene autoregulates and is controlled by both positive and negative cis regulation. *Development* *128*, 4705-4714.

Swevers, L., Cherbas, L., Cherbas, P., and Iatrou, K. (1996). Bombyx EcR (BmEcR) and Bombyx USP (BmCF1) combine to form a functional ecdysone receptor. *Insect Biochem Mol Biol* *26*, 217-221.

Vincent, J. P., Girdham, C. H., and O'Farrell, P. H. (1994). A cell-autonomous, ubiquitous marker for the analysis of *Drosophila* genetic mosaics. *Dev Biol* *164*, 328-331.

Wang, S. S., Kamphuis, W., Huitinga, I., Zhou, J. N., and Swaab, D. F. (2008). Gene expression analysis in the human hypothalamus in depression by laser microdissection and real-time PCR: the presence of multiple receptor imbalances. *Mol Psychiatry* *13*, 786-799, 741.

Wehrli, M., Dougan, S. T., Caldwell, K., O'Keefe, L., Schwartz, S., Vaizel-Ohayon, D., Schejter, E., Tomlinson, A., and DiNardo, S. (2000). arrow encodes an LDL-receptor-related protein essential for Wingless signalling. *Nature* *407*, 527-530.

Wodarz, A., Hinz, U., Engelbert, M., and Knust, E. (1995). Expression of crumbs confers apical character on plasma membrane domains of ectodermal epithelia of *Drosophila*. *Cell* 82, 67-76.
