# Supplementary material
Source: PubMed Central journal article supplement (PMC3268347)

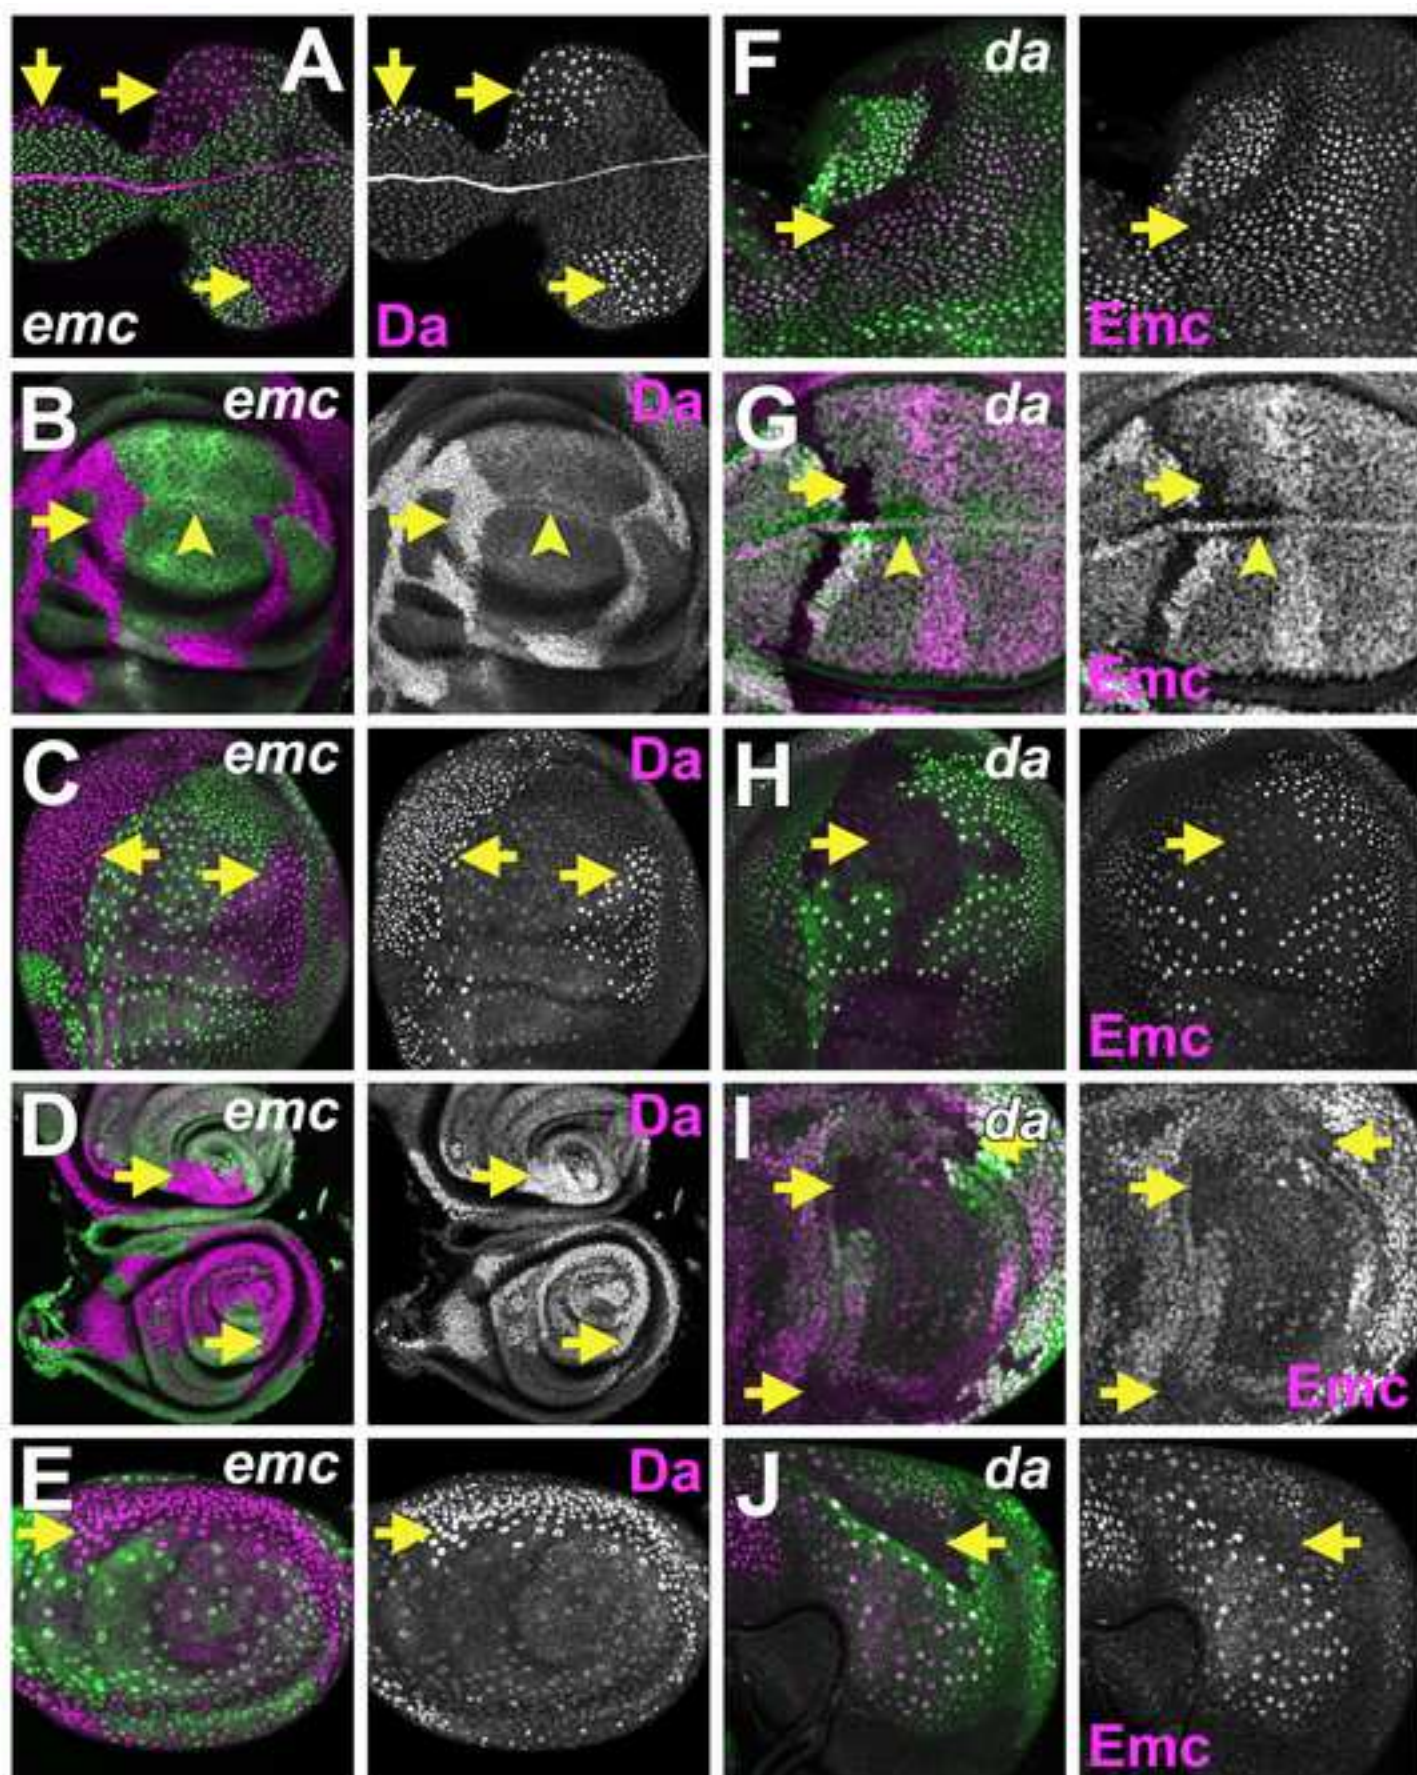

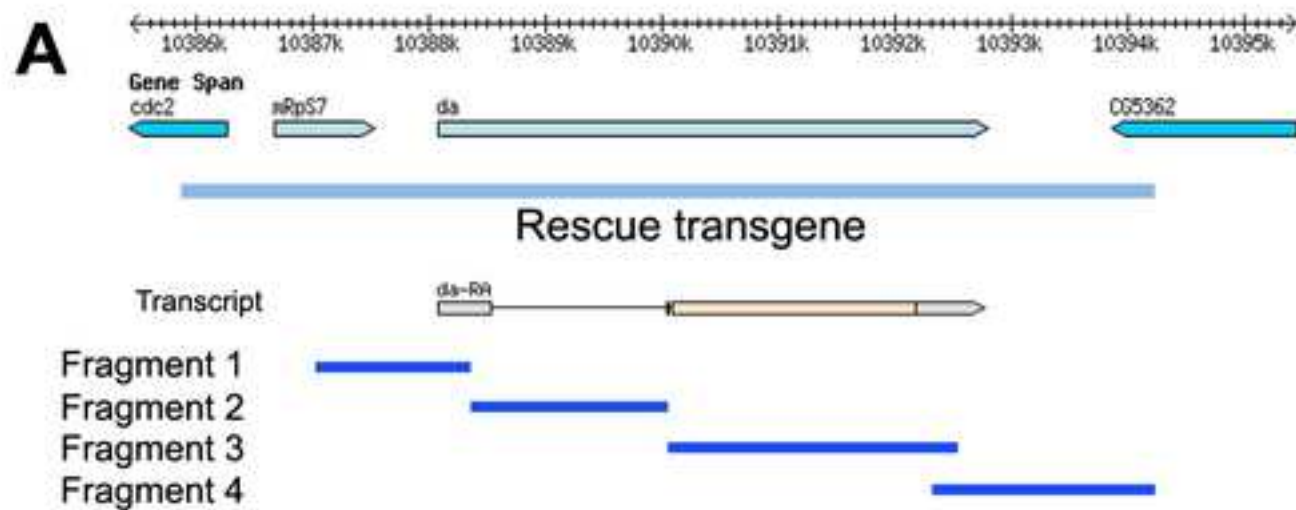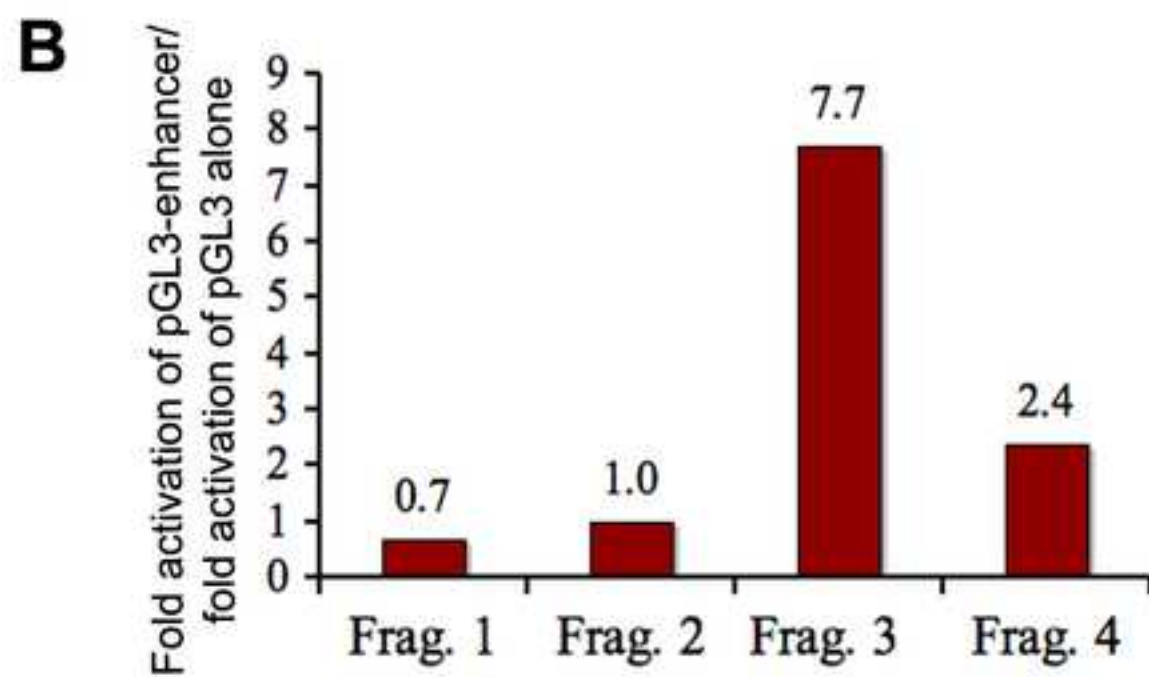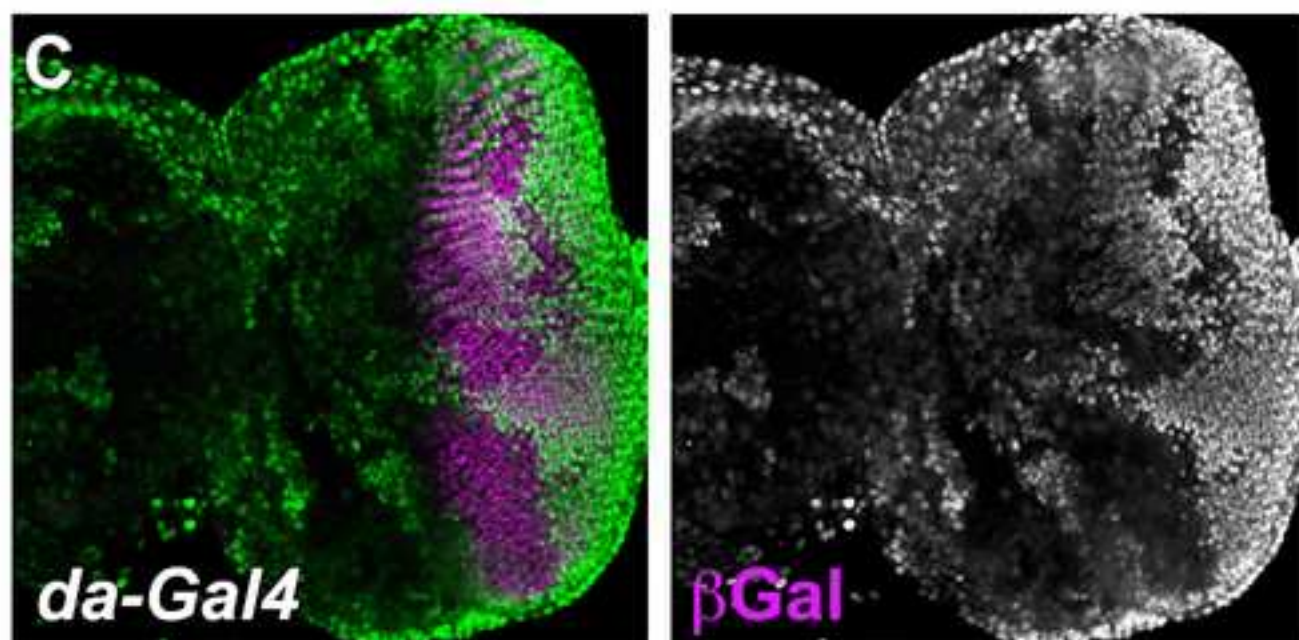

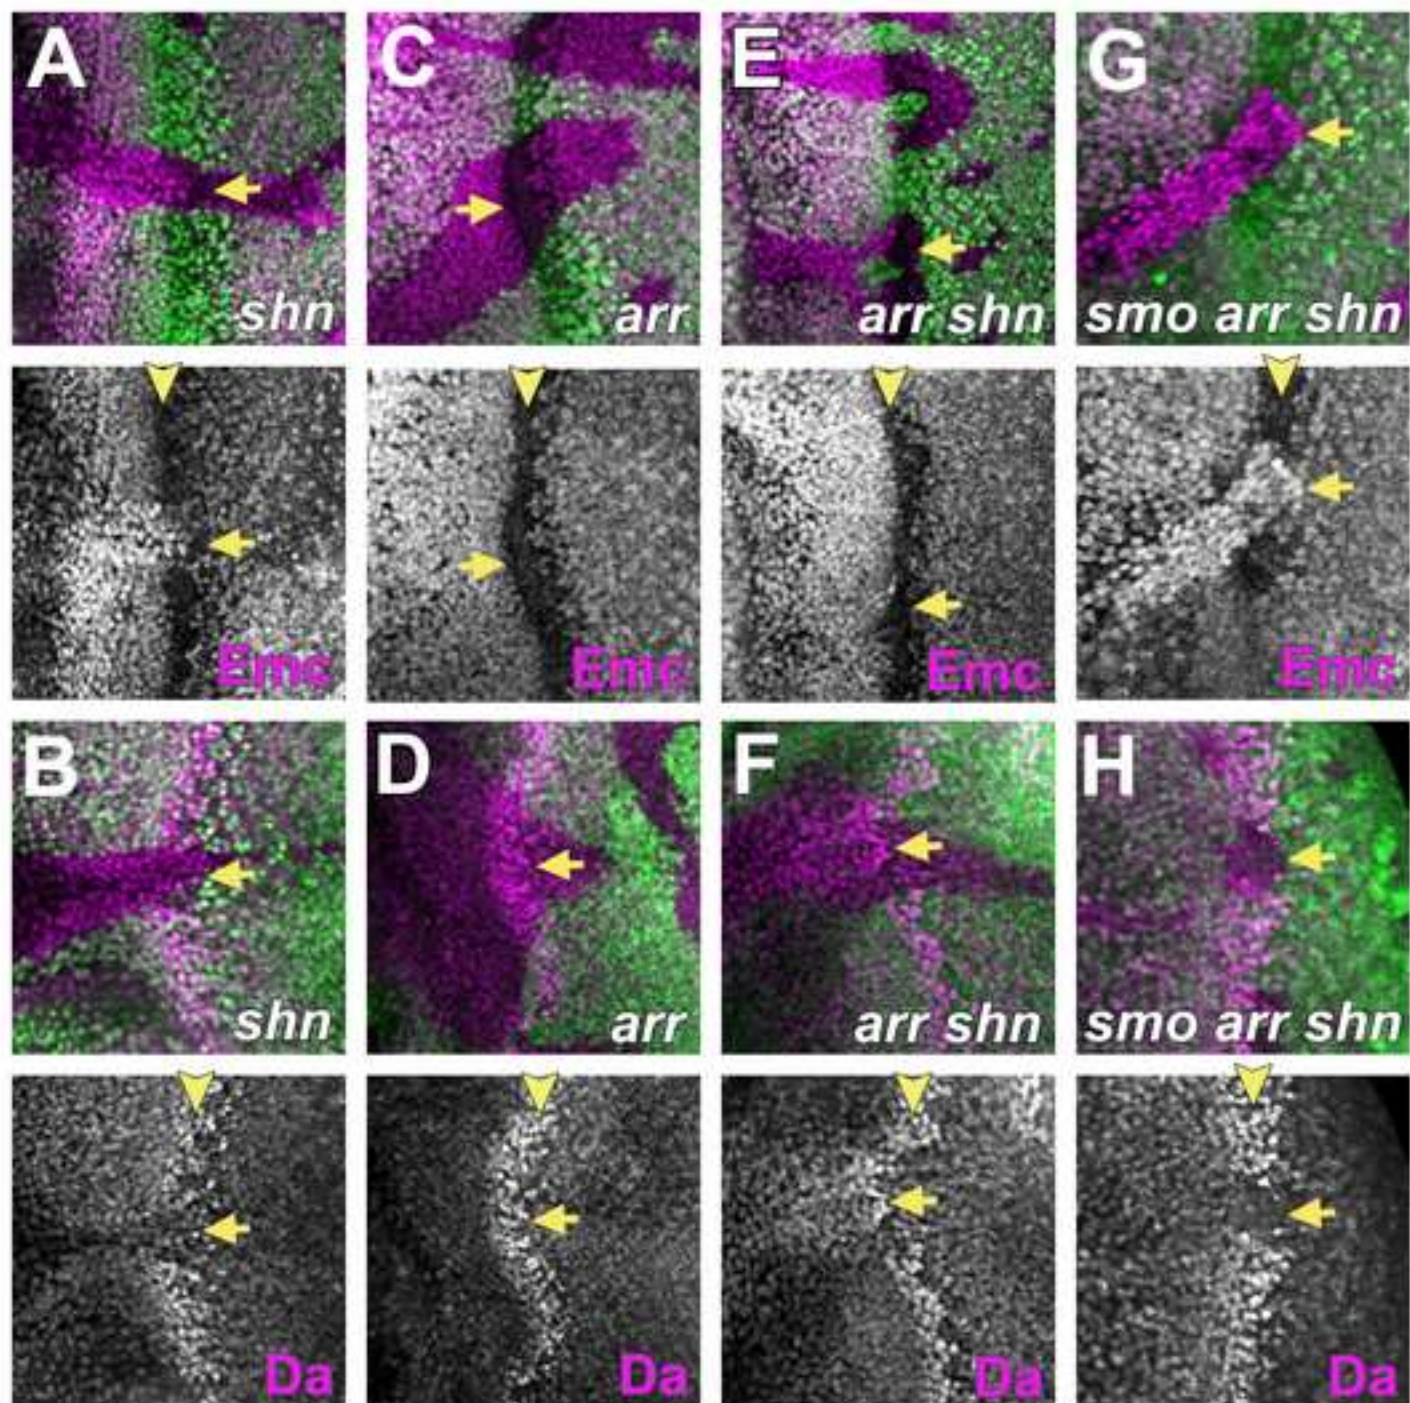

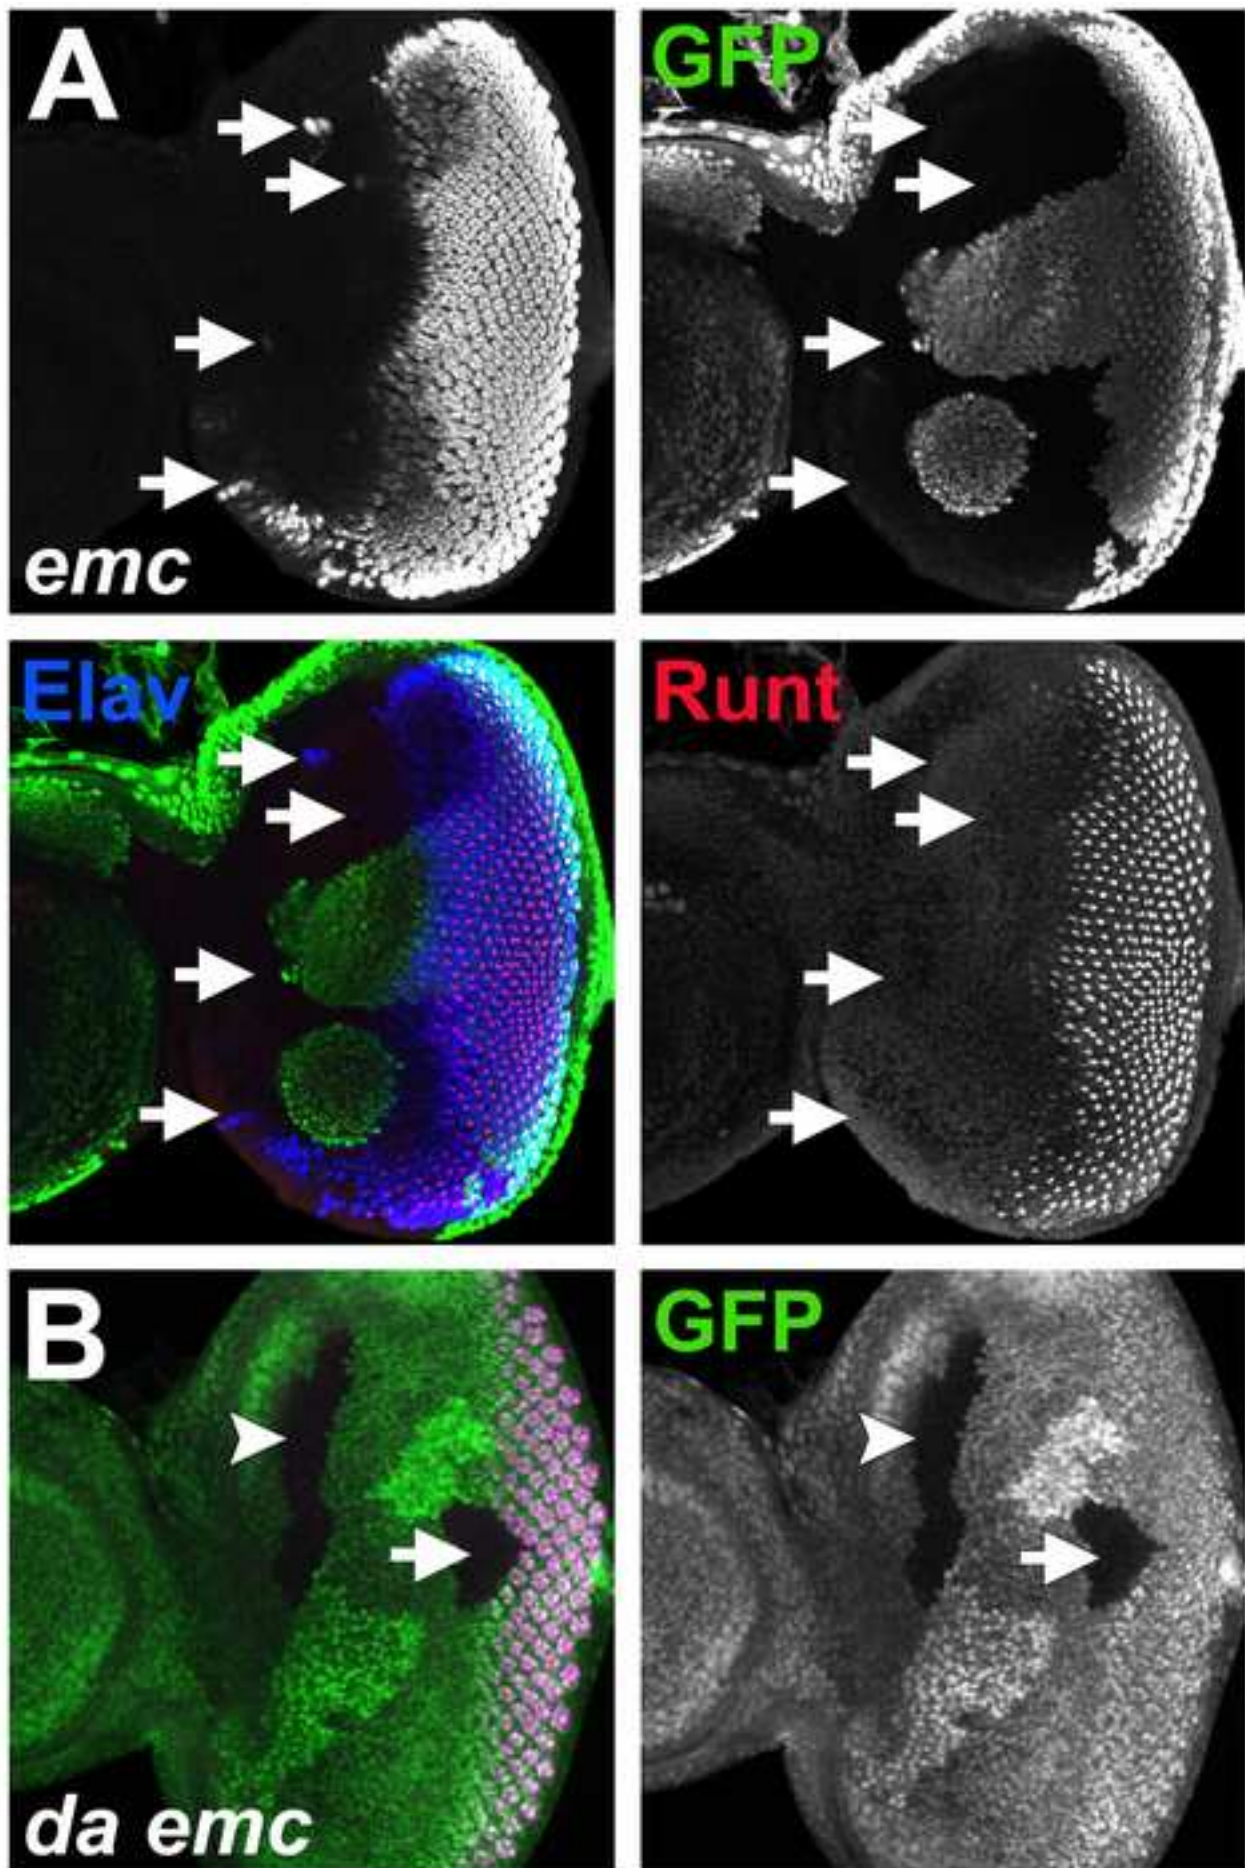

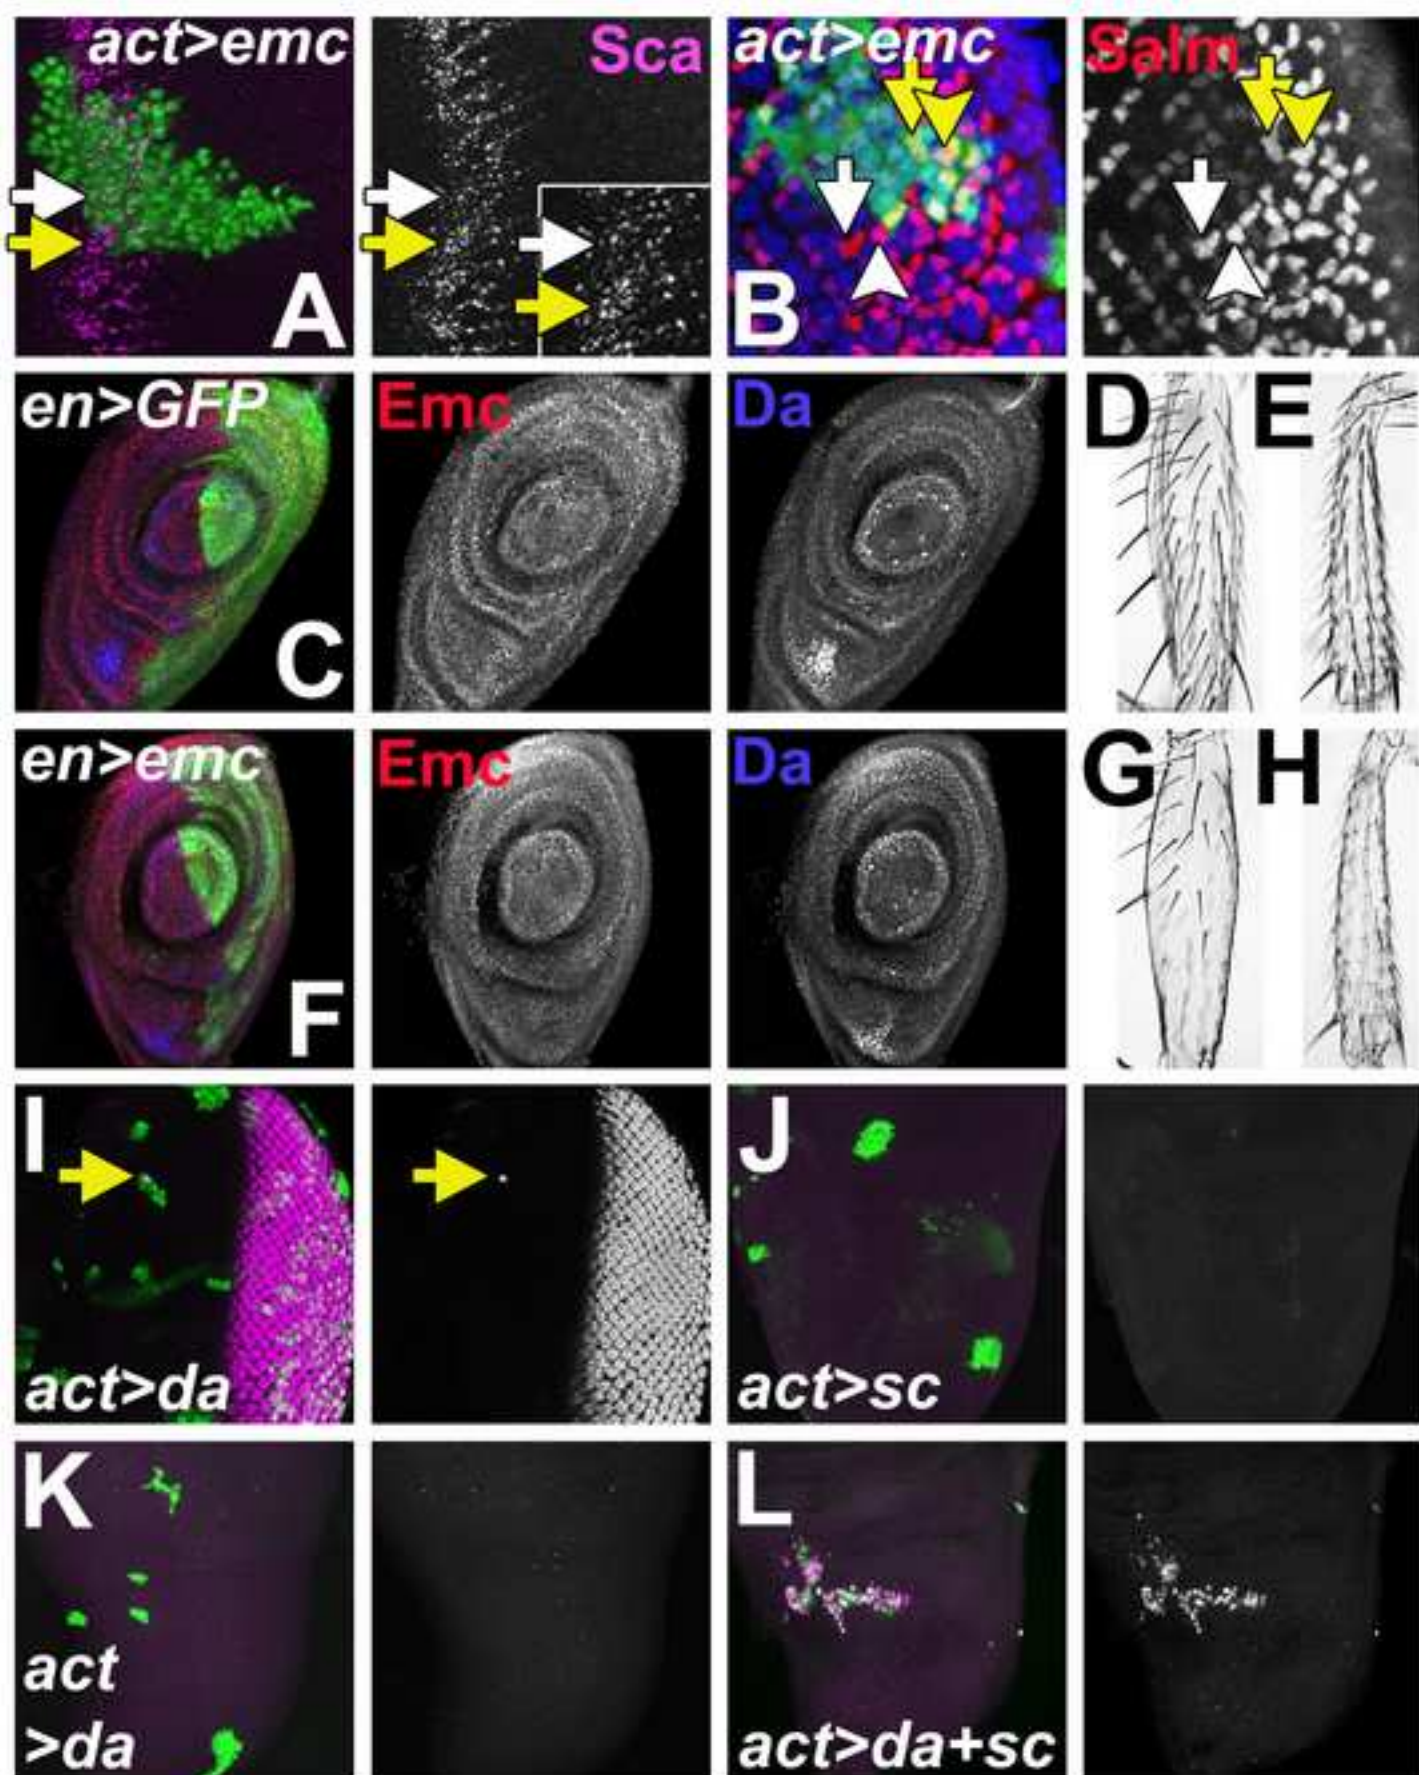

Supplement: NIHMS333424-supplement-02.pdf [file NIHMS333424-supplement-02.pdf]
